# Supplementary material
Source: PubMed Central journal article supplement (PMC7591379)
Supplement: Supp_FigS1.pdf [file Supp_FigS1.pdf]

## Supplementary Data

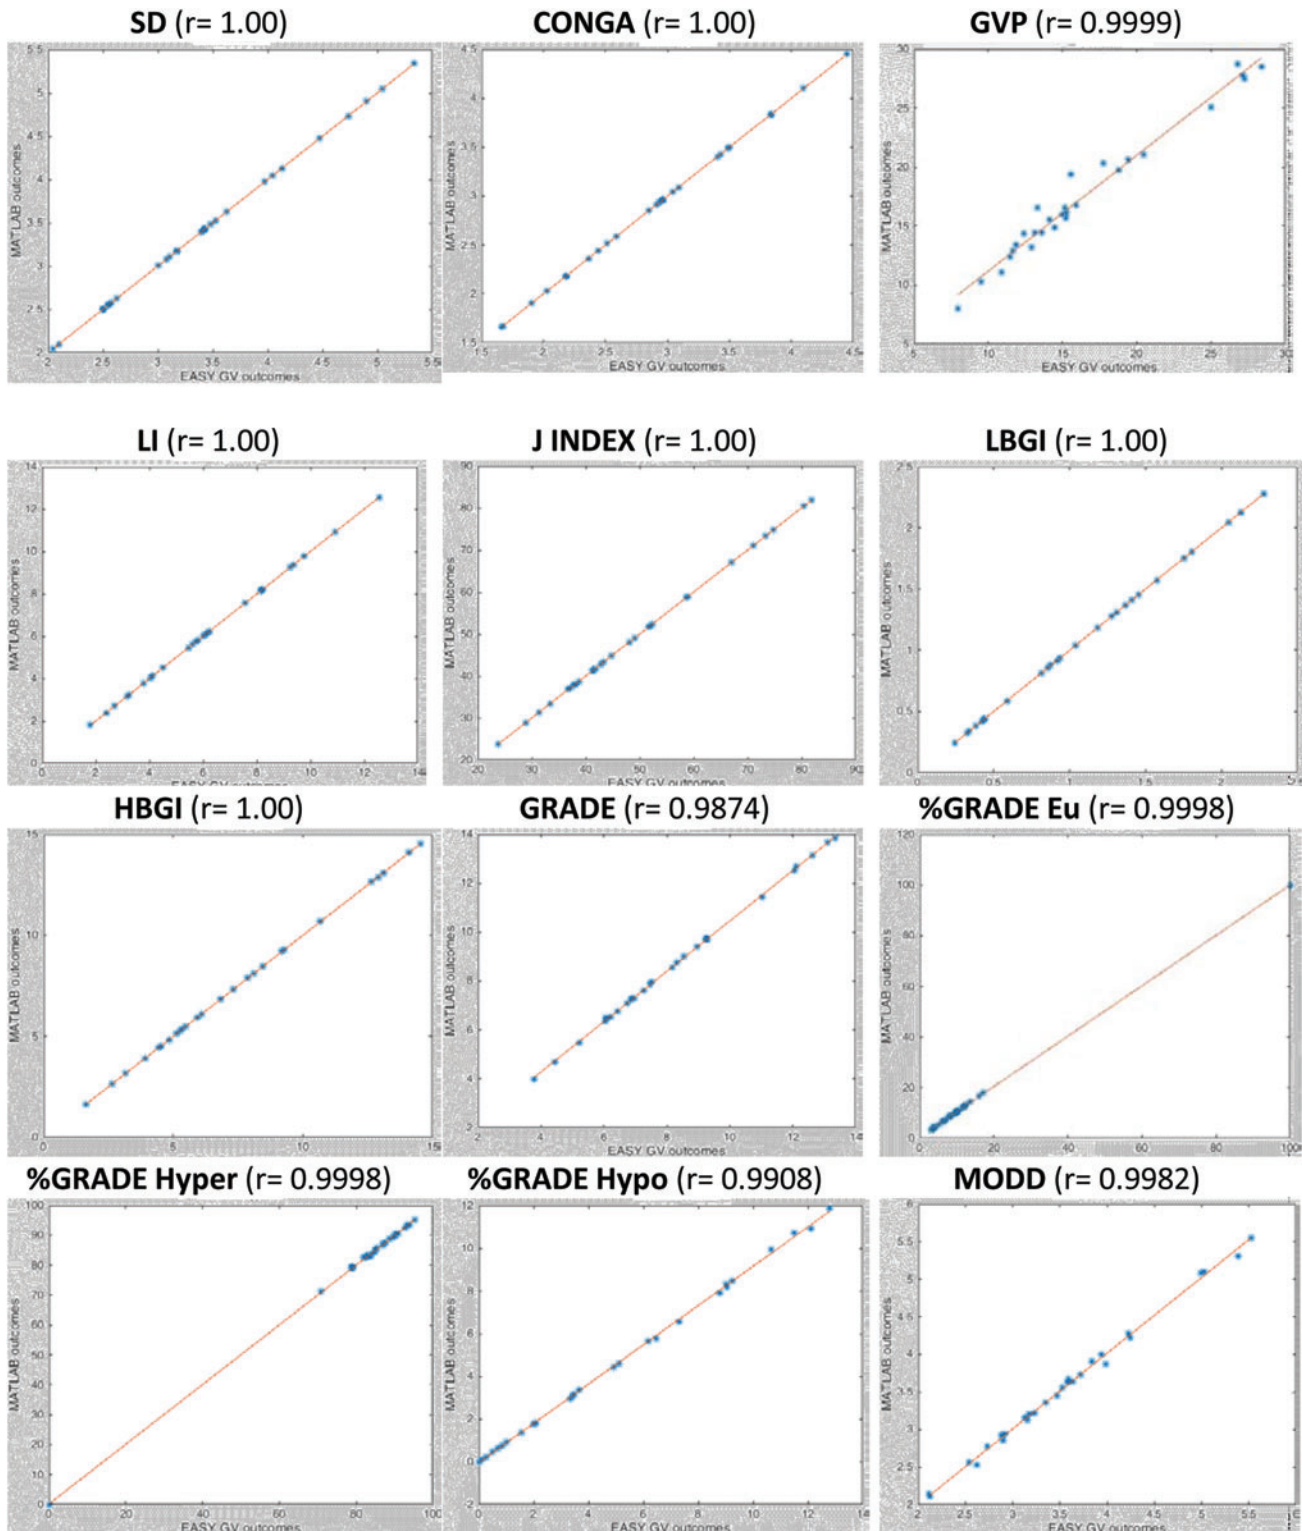

**SUPPLEMENTARY FIG. S1.** Representation of MATLAB outcomes versus EasyGV software v10 outcomes for each assessed metric.

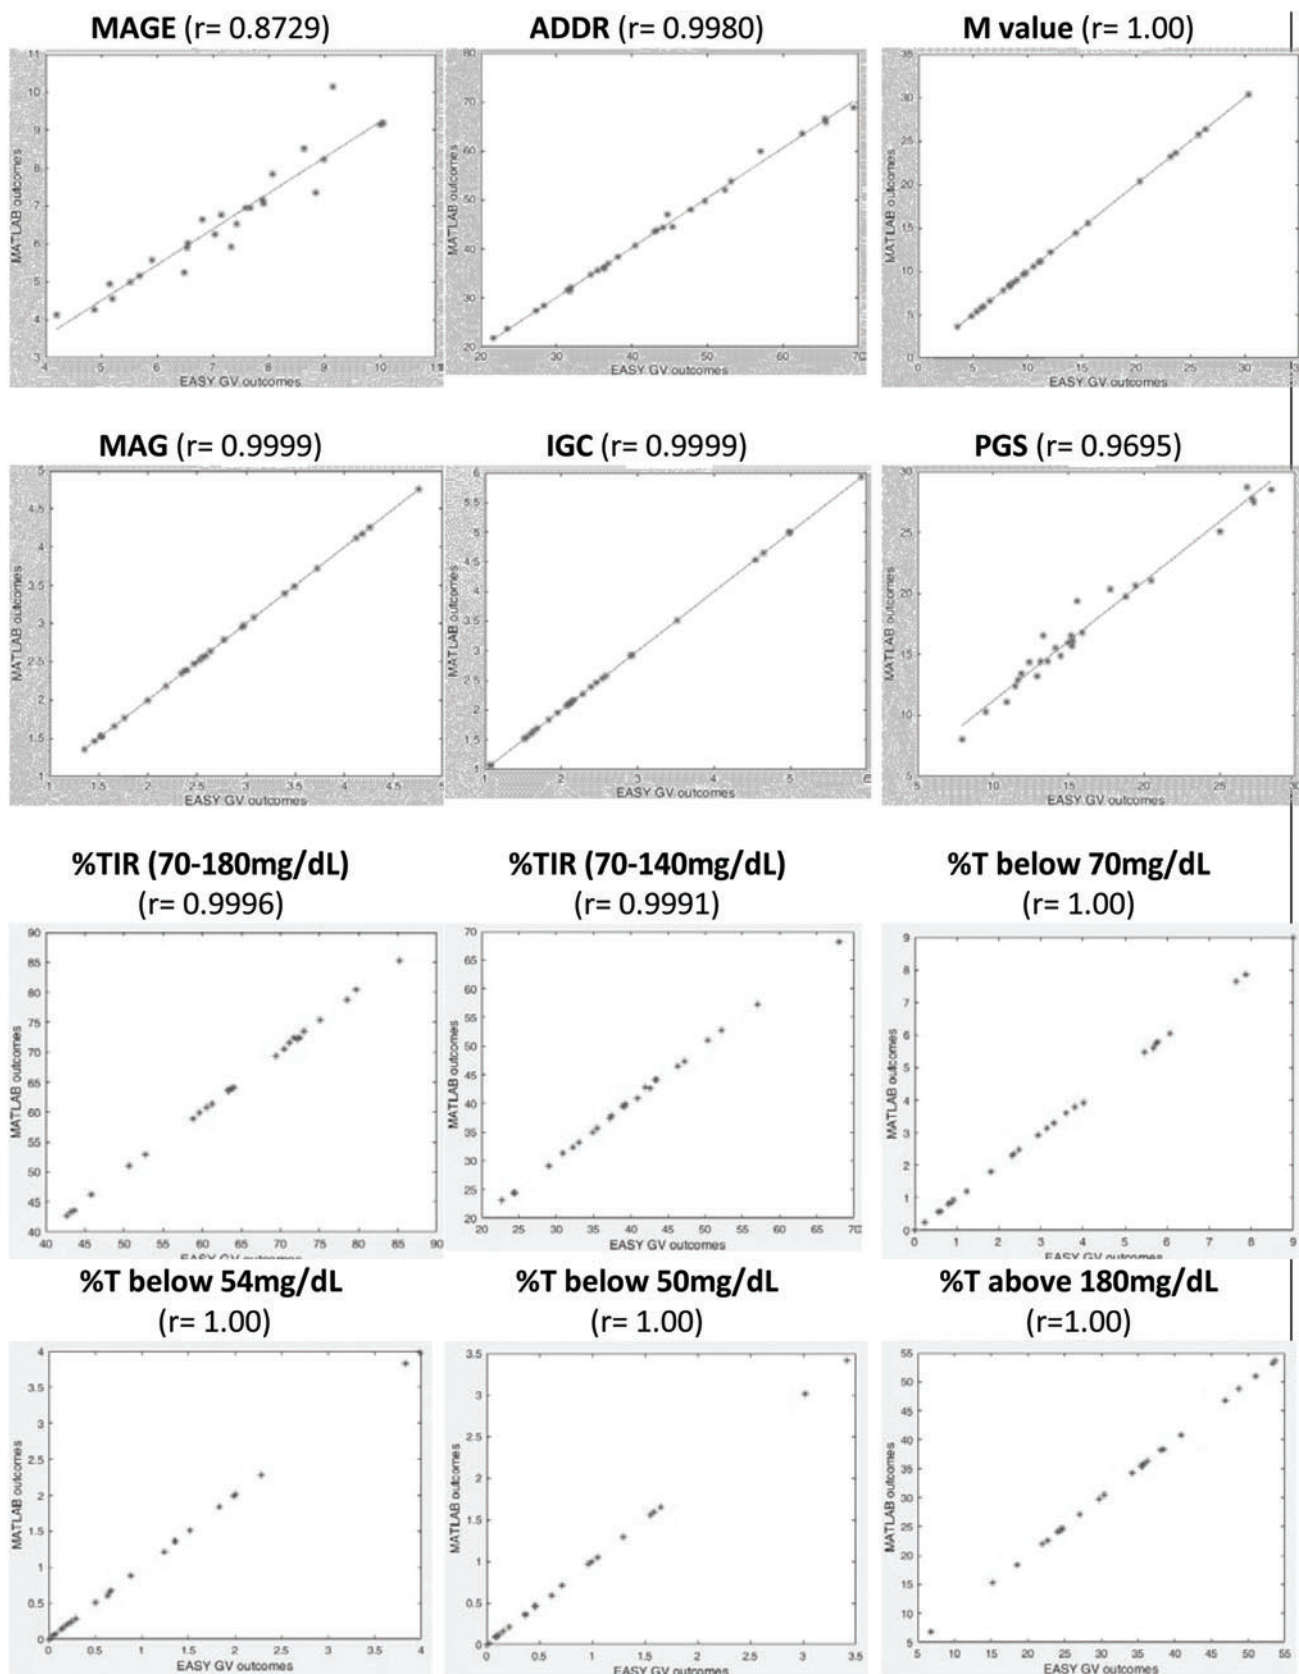

SUPPLEMENTARY FIG. S1. (Continued).
