# Supplementary material
Source: PubMed Central journal article supplement (PMC7591379)
Supplement: Supp_TableS1.pdf [file Supp_TableS1.pdf]

SUPPLEMENTARY TABLE S1. CORRELATION BETWEEN  
 MATLAB AND EASYGV SOFTWARE v10 OUTCOMES  
 FOR EACH ASSESSED METRIC

| <i>Metrics</i>      | R      | 95% CI        | P       |
|---------------------|--------|---------------|---------|
| Mean                | 1.0000 | 1.0000–0.9999 | <0.0001 |
| SD                  | 1.0000 | 1.0000–1.0000 | <0.0001 |
| CV                  | 1.0000 | 1.0000–1.0000 | <0.0001 |
| CONGA1              | 1.0000 | 1.0000–0.9999 | <0.0001 |
| LI                  | 1.0000 | 1.0000–0.9999 | <0.0001 |
| J-index             | 1.0000 | 1.0000–1.0000 | <0.0001 |
| LBGI                | 1.0000 | 1.0000–0.9999 | <0.0001 |
| HBGI                | 1.0000 | 1.0000–1.0000 | <0.0001 |
| GRADE               | 0.9874 | 0.9740–0.9939 | <0.0001 |
| %GRADE-Eu           | 0.9998 | 0.9996–0.9999 | <0.0001 |
| %GRADE-hypo         | 0.9908 | 0.9811–0.9956 | <0.0001 |
| %GRADE-hyper        | 0.9998 | 0.9997–0.9999 | <0.0001 |
| MODD                | 0.9982 | 0.9962–0.9991 | <0.0001 |
| MAGE                | 0.8729 | 0.7464–0.9388 | <0.0001 |
| ADRR                | 0.9980 | 0.9959–0.9990 | <0.0001 |
| $M_{120}$           | 1.0000 | 1.0000–1.0000 | <0.0001 |
| MAG                 | 0.9999 | 0.9999–0.9999 | <0.0001 |
| IGC                 | 0.9999 | 0.9999–0.9999 | <0.0001 |
| PGS                 | 0.9695 | 0.9375–0.9853 | <0.0001 |
| GVP                 | 0.9999 | 0.9999–0.9999 | <0.0001 |
| %T above 180 mg/dL  | 1.0000 | 1.0000–1.0000 | <0.0001 |
| %T below 50 mg/dL   | 1.0000 | 1.0000–1.0000 | <0.0001 |
| %T below 54 mg/dL   | 1.0000 | 0.9999–1.0000 | <0.0001 |
| %T below 70 mg/dL   | 1.0000 | 0.9999–1.0000 | <0.0001 |
| %TIR (70–140 mg/dL) | 0.9991 | 0.9982–0.9996 | <0.0001 |
| %TIR (70–180 mg/dL) | 0.9996 | 0.9992–0.9998 | <0.0001 |

ADRR, average daily risk range; CI, confidence interval; CONGA, continuous overlapping net glycemic action; CV, coefficient of variation; GRADE, Glycemic Risk Assessment in Diabetes Equation; GVP, glucose variability percentage; HBGI, high blood glucose index; IGC, Index Glucose Control; LBGI, low blood glucose index; MAG, mean absolute glucose; MAGE, mean amplitude of glycemic excursions; MODD, mean of daily differences; PGS, personal glycemic state; SD, standard deviation; TIR, time in range.
