# Supplementary material
Source: PubMed Central journal article supplement (PMC7591379)
Supplement: Supp_TableS2.pdf [file Supp_TableS2.pdf]

SUPPLEMENTARY TABLE S2. SUMMARY OF THE IMPROVEMENTS CARRIED OUT IN EASYGV v10 AND ITS VALIDATION

| <i>Metrics</i>      | <i>EasyGV software v9</i>     | <i>EasyGV software v10</i>                      |
|---------------------|-------------------------------|-------------------------------------------------|
| Mean                | Correct metric implementation | Metric successfully validated                   |
| SD                  | Correct metric implementation | Metric successfully validated                   |
| CV                  | Not included                  | Metric included and successfully validated      |
| CONGA1              | Correct metric implementation | Metric successfully validated                   |
| LI                  | Correct metric implementation | Metric successfully validated                   |
| J-index             | Correct metric implementation | Metric successfully validated                   |
| LBI                 | Bug was identified            | Corrected bug and metric successfully validated |
| HBGI                | Bug was identified            | Corrected bug and metric successfully validated |
| GRADE               | Bug was identified            | Corrected bug and metric successfully validated |
| %GRADE-Eu           | Bug was identified            | Corrected bug and metric successfully validated |
| %GRADE-hypo         | Bug was identified            | Corrected bug and metric successfully validated |
| %GRADE-hyper        | Bug was identified            | Corrected bug and metric successfully validated |
| MODD                | Correct metric implementation | Metric successfully validated                   |
| MAGE                | Correct metric implementation | Metric successfully validated                   |
| ADRR                | Bug was identified            | Corrected bug and metric successfully validated |
| $M_{120}$           | Correct metric implementation | Metric successfully validated                   |
| MAG                 | Correct metric implementation | Metric successfully validated                   |
| IGC                 | Not included                  | Metric included and successfully validated      |
| PGS                 | Not included                  | Metric included and successfully validated      |
| GVP                 | Not included                  | Metric included and successfully validated      |
| %T above 180 mg/dL  | Not included                  | Metric included and successfully validated      |
| %T below 50 mg/dL   | Not included                  | Metric included and successfully validated      |
| %T below 54 mg/dL   | Not included                  | Metric included and successfully validated      |
| %T below 70 mg/dL   | Not included                  | Metric included and successfully validated      |
| %TIR (70–140 mg/dL) | Not included                  | Metric included and successfully validated      |
| %TIR (70–180 mg/dL) | Not included                  | Metric included and successfully validated      |
